# Supplementary material for: A nationwide school fruit and vegetable policy and childhood and adolescent overweight: A quasi-natural experimental study
Source: PLoS Med. 2022 Jan 18;19(1):e1003881. doi: 10.1371/journal.pmed.1003881 (PMC8765663; doi:10.1371/journal.pmed.1003881)
Supplement: S2 Table — *NFFV: Individuals who did not attend a school with FFV provision. FFV ≥ 1 year: Individuals who attended a school with FFV provision at least 1 year. ‡In third grade. †Of individuals attending NFFV schools, proportion who attended a school offering the paid fruit and vegetable subscription program. §Parental education prior to possible exposure (when the child was 4 years old). ªThese cohorts had longitudinal data and were pooled in the analysis of BMISDS and OW/OB. BMISDS, body mass index standard deviation score; FFV, free fruit and vegetable; NA, not applicable; NFFV, no free fruit and vegetable; OW/OB, overweight and obesity; Paid-sub, individuals attending schools offering the parental paid subscription program; SD, standard deviation. (DOCX) [file pmed.1003881.s012.docx]

**S2 Table**

**Supporting information – Description of individuals**

S2 Table. Description of individuals included in the analysis of outcomes at age 8.5 (third grade) by attendance at a FFV school in each cohort and pooled across cohorts.

|  | **2010 cohort** | | | **2012 cohort** | | | **2015 cohort** | | | **2017 cohort** | | | **Pooledª 2010, 2015 and 2017*** | | |
| --- | --- | --- | --- | --- | --- | --- | --- | --- | --- | --- | --- | --- | --- | --- | --- |
|  | Total | NFFV* | FFV ≥ 1y* | Total | NFFV* | FFV ≥ 1y* | Total | NFFV* | FFV ≥ 1y* | Total | NFFV* | FFV ≥ 1y* | Total | NFFV* | FFV ≥ 1y* |
| N (%) | 3125 | 2504 (80.1) | 621 (19.9) | 3405 | 2705 (79.4) | 700 (20.6) | 3207 | 2632 (82.1) | 575 (17.9) | 1478 | 1032 (69.8) | 446 (30.2) | 7810 | 6168 (79.0) | 1642 (21.0) |
| Paid-sub†, n (%) | 2505 | 830 (33.2) | NA | 2705 | 768 (28.4) | NA | 2632 | 696 (26.4) | NA | 1032 | 496 (48.1) | NA | 6168 | 2022 (32.8) | NA |
| Age (y), mean (SD)‡ | 8.3 (0.3) | 8.3 (0.3) | 8.3 (0.3) | 8.3 (0.3) | 8.3 (0.3) | 8.3 (0.3) | 8.3 (0.3) | 8.3 (0.3) | 8.3 (0.3) | 8.5 (0.4) | 8.5 (0.4) | 8.5 (0.4) | 8.3 (0.3) | 8.3 (0.3) | 8.4 (0.3) |
| Sex, n (%) |  |  |  |  |  |  |  |  |  |  |  |  |  |  |  |
| Boys | 1605 (51.4) | 1281 (51.2) | 324 (52.2) | 1755 (51.5) | 1380 (51.0) | 375 (53.6) | 1636 (51.0) | 1342 (51.0) | 296 (51.1) | 732 (49.5) | 518 (50.2) | 214 (48.0) | 3973 (50.9) | 3141 (50.9) | 832 (50.7) |
| Girls | 1520 (48.6) | 1223 (48.8) | 297 (47.8) | 1650 (48.5) | 1325 (49.0) | 325 (46.4) | 1571 (49.0) | 1290 (49.0) | 281 (48.9) | 746 (50.5) | 514 (49.8) | 232 (52.0) | 3837 (49.1) | 3027 (49.1) | 810 (49.3) |
| Population density, n (%)‡ | |  |  |  |  |  |  |  |  |  |  |  |  |  |  |
| Urban | 2445 (78.2) | 2033 (81.2) | 412 (66.3) | 2658 (78.1) | 2231 (82.5) | 427 (61.0) | 2486 (77.5) | 2134 (81.1) | 352 (61.2) | 897 (60.7) | 669 (64.8) | 228 (51.1) | 5828 (74.6) | 4836 (78.4) | 992 (60.4) |
| Semi-urban | 408 (13.1) | 301 (12.0) | 107 (17.2) | 456 (13.4) | 312 (11.5) | 144 (20.6) | 480 (15.0) | 350 (13.3) | 130 (22.6) | 360 (24.4) | 242 (23.5) | 118 (26.5) | 1248 (16.0) | 893 (14.5) | 355 (21.6) |
| Rural | 272 (8.7) | 170 (6.8) | 102 (16.4) | 291 (8.6) | 162 (6.0) | 129 (18.4) | 241 (7.5) | 148 (5.6) | 93 (16.2) | 221 (15.0) | 121 (11.7) | 100 (22.4) | 734 (9.4) | 439 (7.1) | 295 (18.0) |
| Region, n (%)‡ |  |  |  |  |  |  |  |  |  |  |  |  |  |  |  |
| Southern/Eastern | 1717 (54.9) | 1483 (59.2) | 234 (37.7) | 1868 (54.9) | 1627 (60.2) | 241 (34.4) | 1741 (54.3) | 1588 (60.3) | 153 (26.6) | 387 (26.1) | 284 (27.5) | 103 (23.1) | 3845 (49.2) | 3355 (54.4) | 490 (29.8) |
| Western | 706 (22.6) | 563 (22.5) | 143 (23.0) | 747 (21.9) | 570 (21.1) | 177 (25.3) | 748 (23.3) | 571 (21.7) | 177 (30.8) | 403 (27.3) | 311 (30.1) | 92 (20.6) | 1857 (23.8) | 1445 (23.4) | 412 (25.1) |
| Central | 365 (11.7) | 267 (10.7) | 98 (15.8) | 418 (12.3) | 298 (11.0) | 120 (17.1) | 346 (10.8) | 248 (9.4) | 98 (17.0) | 334 (22.6) | 220 (21.3) | 114 (25.6) | 1045 (13.4) | 735 (11.9) | 310 (18.9) |
| Northern | 337 (10.8) | 191 (7.6) | 146 (23.5) | 372 (10.9) | 210 (7.8) | 162 (23.1) | 372 (11.6) | 225 (8.6) | 147 (25.6) | 354 (24.0) | 217 (21.0) | 137 (30.7) | 1063 (13.6) | 633 (10.3) | 430 (26.2) |
| Parental education, n (%)§ | |  |  |  |  |  |  |  |  |  |  |  |  |  |  |
| <Higher | 1444 (46.2) | 1117 (44.6) | 327 (52.7) | 1431 (42.0) | 1119 (41.4) | 312 (44.6) | 1229 (38.3) | 973 (37.0) | 256 (44.5) | 586 (39.7) | 396 (38.4) | 190 (42.6) | 3259 (41.7) | 2486 (40.3) | 773 (47.1) |
| Higher+ | 1681 (53.8) | 1387 (55.4) | 294 (47.3) | 1974 (58.0) | 1586 (58.6) | 388 (55.4) | 1978 (61.7) | 1659 (63.0) | 319 (55.5) | 892 (60.4) | 636 (61.6) | 256 (57.4) | 4551 (58.3) | 3682 (59.7) | 869 (52.9) |

*NFFV: Individuals who did not attend a school with free fruit and vegetable provision; FFV ≥ 1y: Individuals attended a school with free fruit and vegetable provision at least one year.

‡In 3rd grade, school

†Of in individuals attending NFFV schools, proportion who attend a school offering the paid fruit and vegetable subscription program.

§Parental education prior to possible exposure (when the child was four years old).

ªThese cohorts had longitudinal data and were pooled in analysis of BMISDS and OW/OB.

BMISDS: body mass index standard deviation scores; FFV: Free fruit and vegetables; NA: not applicable; NFFV: No free fruit and vegetables; OW/OB: overweight and obesity; Paid-sub: Individuals attending schools offering the parental paid subscription program; SD: Standard deviation.; y: year.
